# Supplementary material for: Changes in the Quality of Life in Patients with Type 2 Diabetes Mellitus According to Physician and Patient Behaviors
Source: PubMed Central journal article supplement — Diabetes Metab J. 2019 Oct 23;44(1):91–102. doi: 10.4093/dmj.2018.0251 (PMC7043976; doi:10.4093/dmj.2018.0251), 2019-10-23
Supplement: dmj-44-91-s001.pdf [file dmj-44-91-s001.pdf]

**Supplementary Table 1.** Nineteen domains of Korean version of the Audit of Diabetes Dependent Quality of Life

| Domain                     | If I did not have diabetes... (Impact)/<br>This aspect of my life is (Importance)                   | Response item                                                                |
|----------------------------|-----------------------------------------------------------------------------------------------------|------------------------------------------------------------------------------|
| Leisure activities         | I would enjoy my leisure activities                                                                 | (very much more–less)/(very important–not at all important)                  |
| Working life               | My working life would be                                                                            | (very much better–worse) <sup>a</sup> /(very important–not at all important) |
| Journeys                   | Local or long distance journeys would be                                                            | (very much easier–more difficult)/(very important–not at all important)      |
| Holidays                   | My holidays would be                                                                                | (very much better–worse) <sup>a</sup> /(very important–not at all important) |
| Physical health            | Physically I could do                                                                               | (very much more–less)/(very important–not at all important)                  |
| Family life                | My family life would be                                                                             | (very much better–worse) <sup>a</sup> /(very important–not at all important) |
| Friendship and social life | My friendships and social life would be                                                             | (very much better–worse)/(very important–not at all important)               |
| Personal relationship      | My closest personal relationship would be                                                           | (very much better–worse) <sup>a</sup> /(very important–not at all important) |
| Sex life                   | My sex life would be                                                                                | (very much better–worse) <sup>a</sup> /(very important–not at all important) |
| Physical appearance        | My physical appearance would be                                                                     | (very much better–worse)/(very important–not at all important)               |
| Self-confidence            | My self-confidence would be                                                                         | (very much better–worse)/(very important–not at all important)               |
| Motivation                 | My motivation would be                                                                              | (very much better–worse)/(very important–not at all important)               |
| People's reaction          | The way people in general react to me would be                                                      | (very much better–worse)/(very important–not at all important)               |
| Feelings about future      | My feelings about the future (e.g., worries, hopes) would be                                        | (very much better–worse)/(very important–not at all important)               |
| Financial situation        | My financial situation would be                                                                     | (very much better–worse)/(very important–not at all important)               |
| Living conditions          | My living conditions would be                                                                       | (very much better–worse)/(very important–not at all important)               |
| Dependence on others       | I would have to depend on others when I do not want to                                              | (very much less–more)/(very important–not at all important)                  |
| Freedom to eat             | My freedom to eat as I wish would be                                                                | (very much greater–less)/(very important–not at all important)               |
| Freedom to drink           | My freedom to drink as I wish (e.g., fruit juice, alcohol, sweetened hot, and cold drinks) would be | (very much greater–less)/(very important–not at all important)               |

<sup>a</sup>These items include a preliminary “Yes/No” question to determine if the item is applicable.
